# Supplementary material
Source: PubMed Central journal article supplement (PMC2951209)

## SUPPLEMENTAL DATA

### Supplemental TABLE 1

Levels of eicosanoids produced by Dectin-1<sup>-/-</sup> peritoneal macrophages relative to wild type macrophages stimulated with *C. albicans* and P-βG

| Time | Eicosanoid                | <i>C. albicans</i> | P-βG     |
|------|---------------------------|--------------------|----------|
|      |                           | %                  | %        |
| 1 h  | PGE <sub>2</sub>          | 32.8±9.2*          | 0.7±0.6* |
|      | 6-keto PGF <sub>1</sub> α | 35.0±6.0*          | 3.8±2.7* |
|      | LTC <sub>4</sub>          | 44.6±12.3*         | 4.3±2.3* |
| 6 h  | PGE <sub>2</sub>          | 141.6±25.2         | 6.3±3.2* |
|      | 6-keto PGF <sub>1</sub> α | 133.3±28.9         | 6.3±4.0* |
|      | LTC <sub>4</sub>          | 155.5±34.9         | 7.7±4.9* |

The *asterisk* indicates a significant decrease ( $p < 0.05$ ) in eicosanoid production by Dectin-1<sup>-/-</sup> macrophages compared to wild type macrophages (100%).

**Supplemental TABLE 2**

Levels of eicosanoids produced by MyD88<sup>-/-</sup> peritoneal macrophages relative to wild type macrophages stimulated with *C. albicans*

| <b>Time</b> | <b>Eicosanoid</b>         | <b><i>C. albicans</i></b> |
|-------------|---------------------------|---------------------------|
|             |                           | %                         |
| 6 h         | PGE <sub>2</sub>          | 6.8±3.3*                  |
|             | 6-keto PGF <sub>1</sub> α | 15.0±3.1*                 |
|             | LTC <sub>4</sub>          | 14.4±5.5*                 |

The *asterisk* indicates a significant decrease ( $p < 0.05$ ) in eicosanoid production by MyD88<sup>-/-</sup> macrophages compared to wild type macrophages (100%).

## FIGURE LEGENDS

**Supplemental Fig. 1. FACS analysis of RAW264.7 Dectin-1 and Dectin-2 over-expressing cell lines.** RAW264.7 cells expressing Dectin-1, Dectin-2 or empty vectors (pFBNeo, pMX-IZ) were stained with anti-Dectin-1 (open histograms in upper panels), anti-Dectin-2 (open histograms in lower panels) or with isotype-control antibody (shaded histograms). RAW264.7 controls express a low level of Dectin-1 but not Dectin-2, and their expression is increased in cells stably over-expressing these receptors.

**Supplemental Fig. 2. Calcium responses of RAW264.7 Dectin-1 and Dectin-2 over-expressing cell lines to ionomycin.** Live cell calcium imaging of vector control cells and RAW264.7 cells expressing Dectin-1 or Dectin-2 loaded with Fluo-4 was carried out over time after the addition of 1  $\mu$ M ionomycin. Data are presented ( $F_T/F_0$ ) relative to time 0, and starting  $F_0$  for each cell is set at 1. Each tracing represents data from an individual cell from a representative of 3 experiments. Ionomycin induces increases in  $[Ca^{2+}]_i$  in vector controls and in RAW264.7 cells over-expressing Dectin-1 and Dectin-2. For reasons not understood there is a more sustained increase in  $[Ca^{2+}]_i$  in cells over-expressing Dectin-1.

# Supplemental Fig. 1

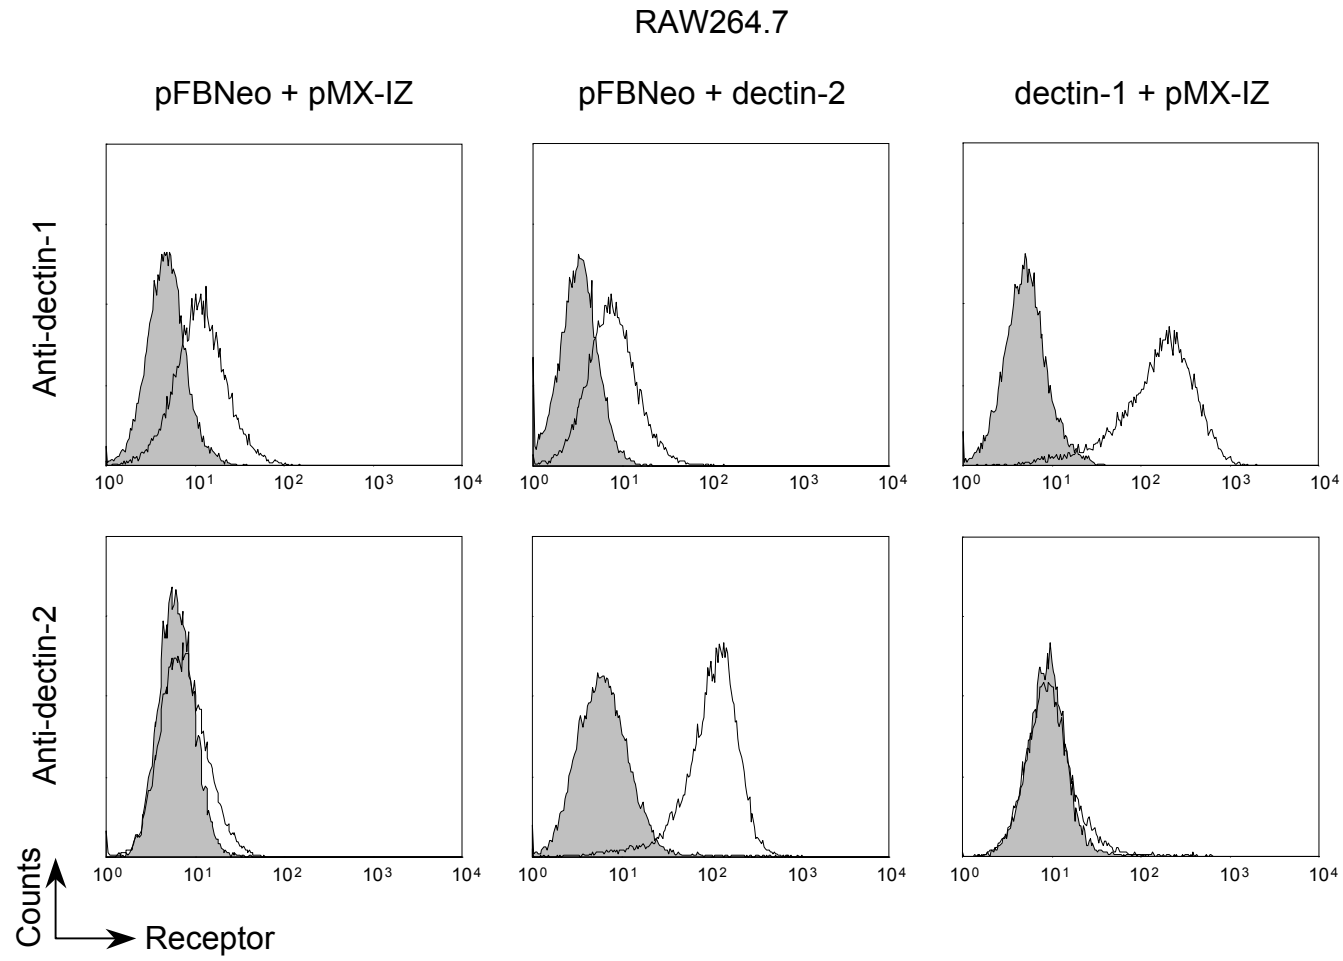

Supplemental Fig. 2

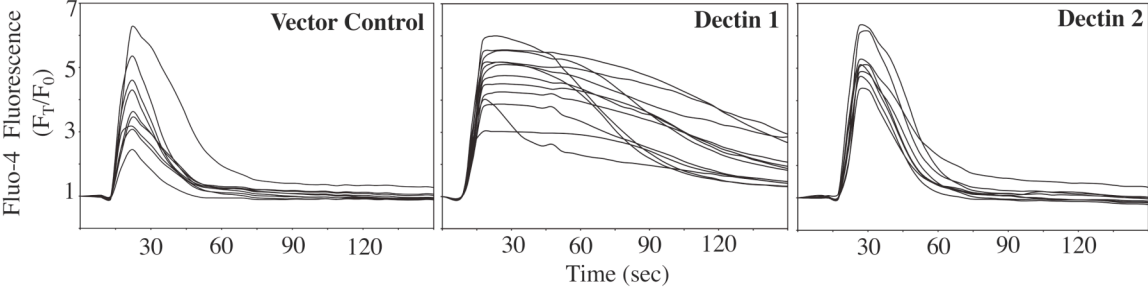

Supplement: supp_M110.151449_Supplem_Tables_legends_82110.pdf [file supp_M110.151449_Supplem_Tables_legends_82110.pdf]
